# Supplementary material
Source: Springer Nature journal article supplement (https://www.springermedizin.de/resource/supplementary/12891_2012_1593_MOESM1_ESM.pdf/9509096)
Supplement: MOESM1 [file 9509096]

Survey questionnaire to identify patients with CANS

Cohort of patients with CANS

Verify inclusion criteria

Information brochure and informed consent form handed to eligible patients

Consent given?

YES

Personal login for web -  
questionnaires is  
mailed to patient

NO

No further contact  
made

Baseline measurements :  
MI:JCQ, FABQ, IPA, PCS, DMQ,  
Baseline questionnaire PPD  
Outcomes: DASH, VAS

Follow-up after 6 weeks :  
Outcomes: DASH, VAS, GPE

Follow-up after 12 weeks :  
Outcomes: DASH, VAS, GPE

Follow-up after 26 weeks :  
Outcomes: DASH, VAS, GPE

Follow-up after 52 weeks:  
MI: JCQ, FABQ, IPA, PCS, DMQ  
questionnaire PPD  
Outcomes: DASH, VAS, GPE
